# Supplementary material
Source: Springer Nature journal article supplement (https://www.springermedizin.de/resource/supplementary/12888_2011_881_MOESM1_ESM.pdf/9478444)

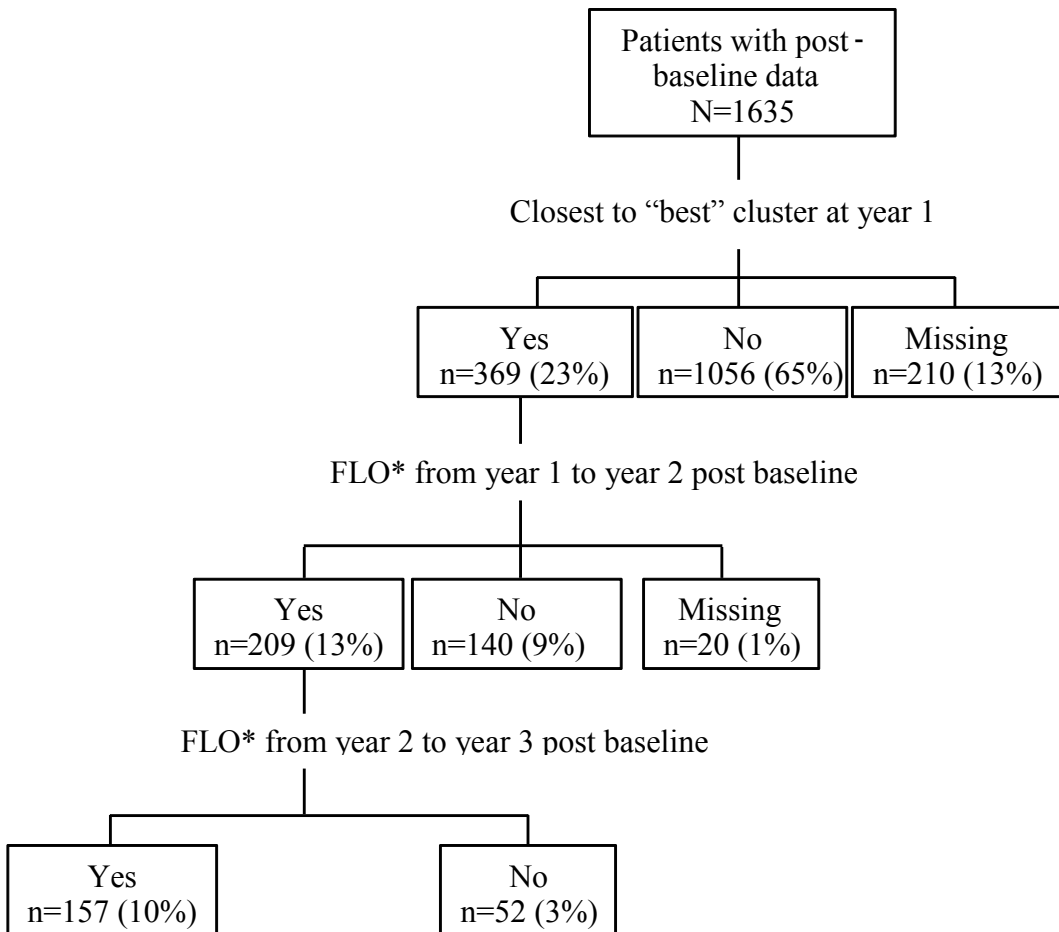

Abbreviation: FLO = Favorable long-term outcome

Supplement: MOESM1 [file 9478444]
